# Supplementary material
Source: PubMed Central journal article supplement (PMC7857357)

A.

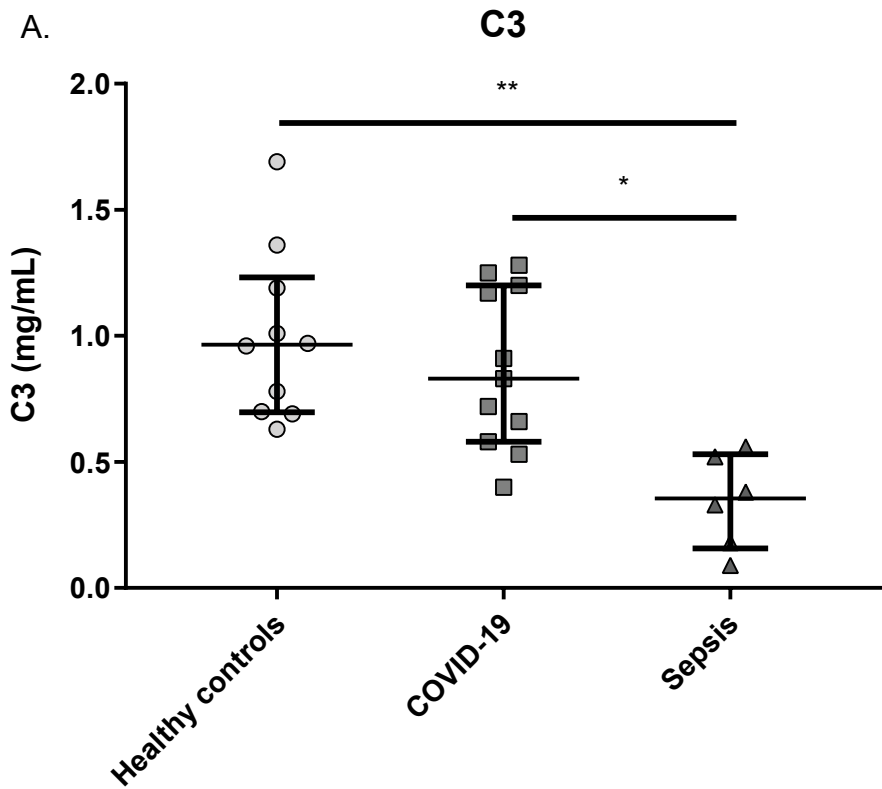

Supplement: jiaa646_supp_supplementary_figure_1a.pdf [file jiaa646_supp_supplementary_figure_1a.pdf]

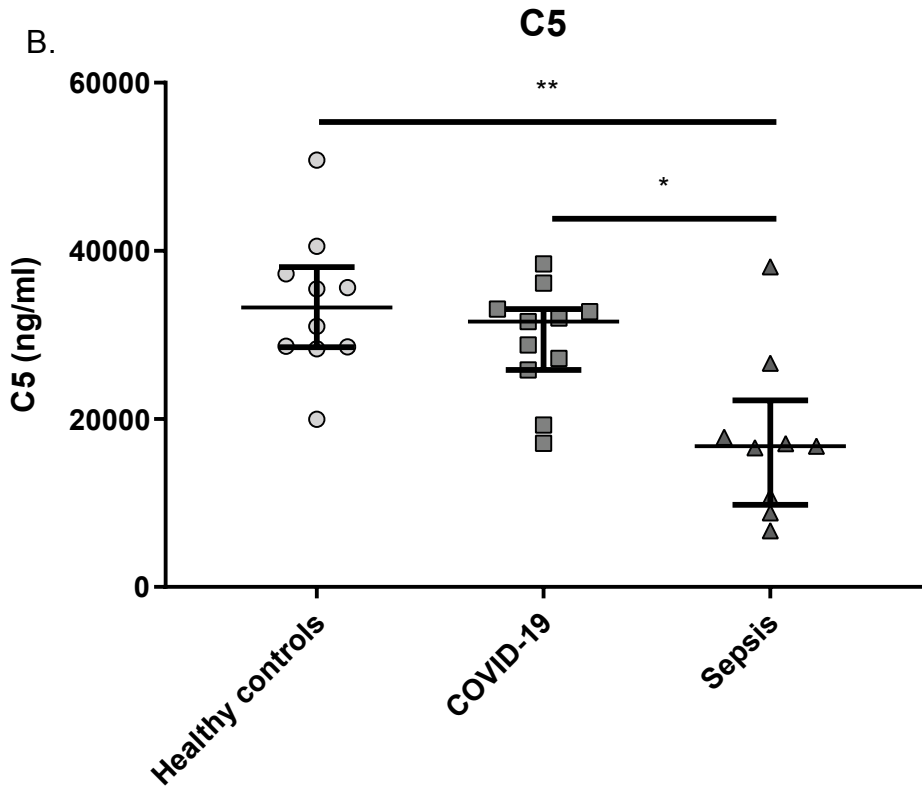

Supplement: jiaa646_supp_supplementary_figure_1b.pdf [file jiaa646_supp_supplementary_figure_1b.pdf]

C.

**C5a**

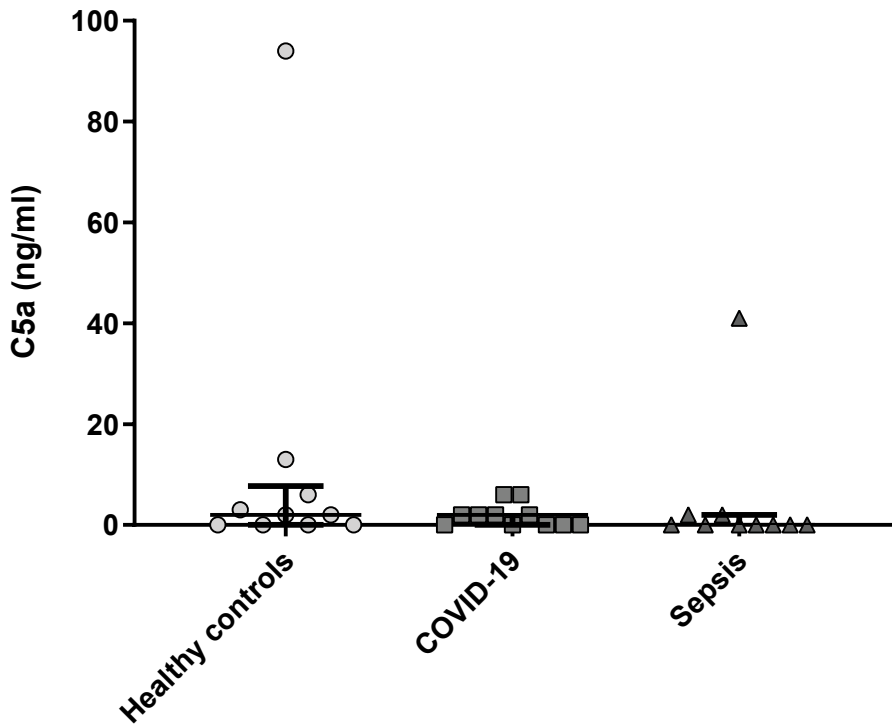

Supplement: jiaa646_supp_supplementary_figure_1c.pdf [file jiaa646_supp_supplementary_figure_1c.pdf]

A.

C3a

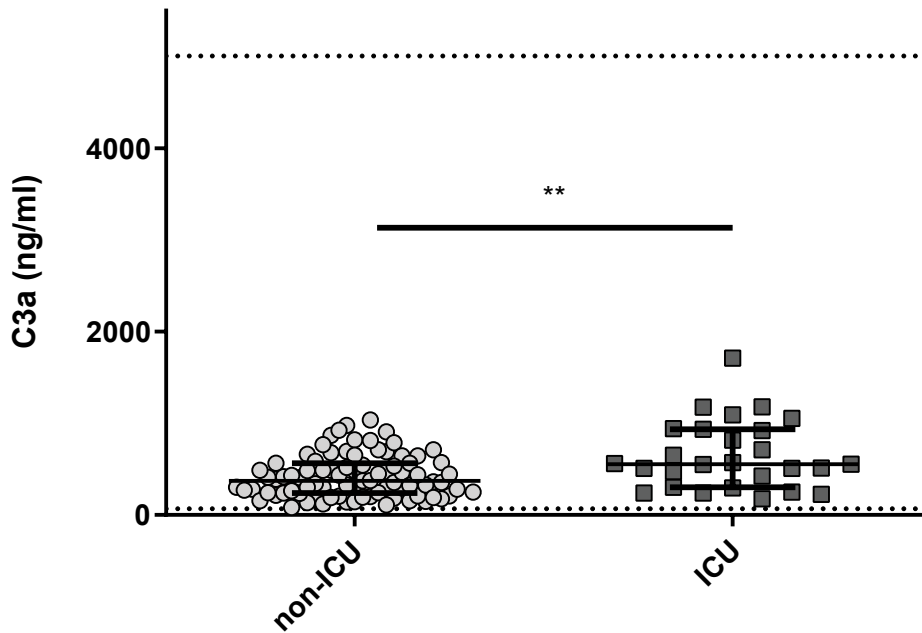

Supplement: jiaa646_supp_supplementary_figure_2a.pdf [file jiaa646_supp_supplementary_figure_2a.pdf]

B.

C3c

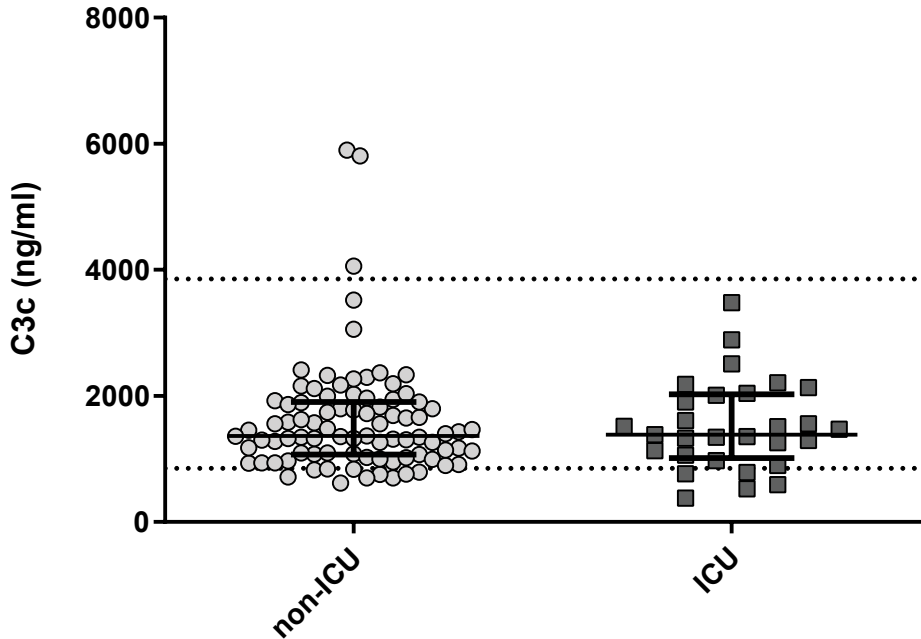

Supplement: jiaa646_supp_supplementary_figure_2b.pdf [file jiaa646_supp_supplementary_figure_2b.pdf]

C.

TCC

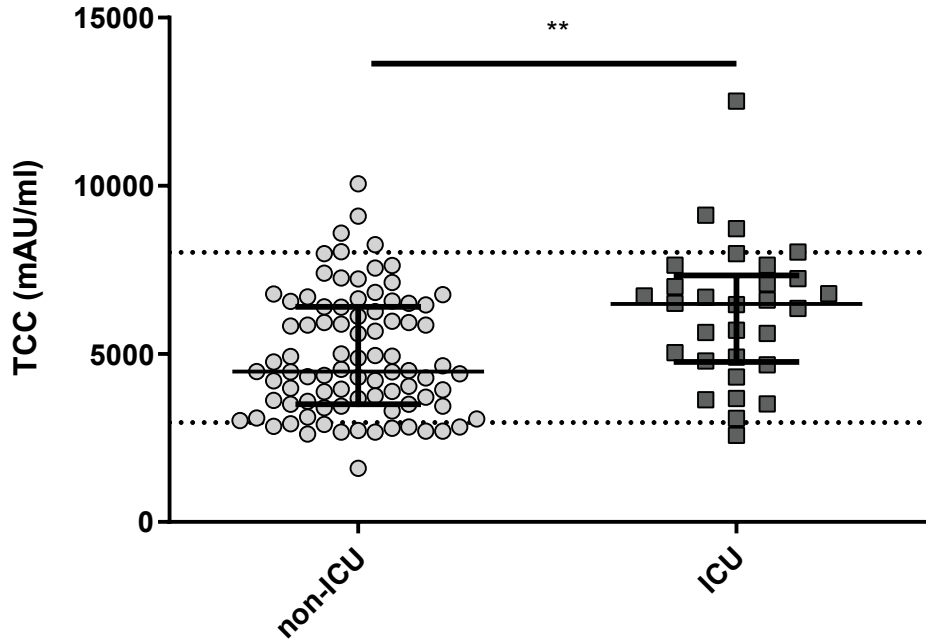

Supplement: jiaa646_supp_supplementary_figure_2c.pdf [file jiaa646_supp_supplementary_figure_2c.pdf]

A.

C3a

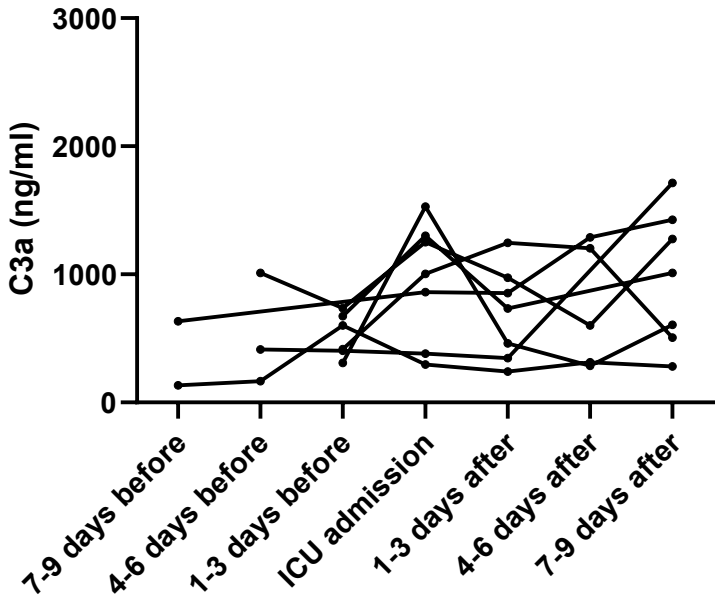

Supplement: jiaa646_supp_supplementary_figure_3a.pdf [file jiaa646_supp_supplementary_figure_3a.pdf]

B.

C3c

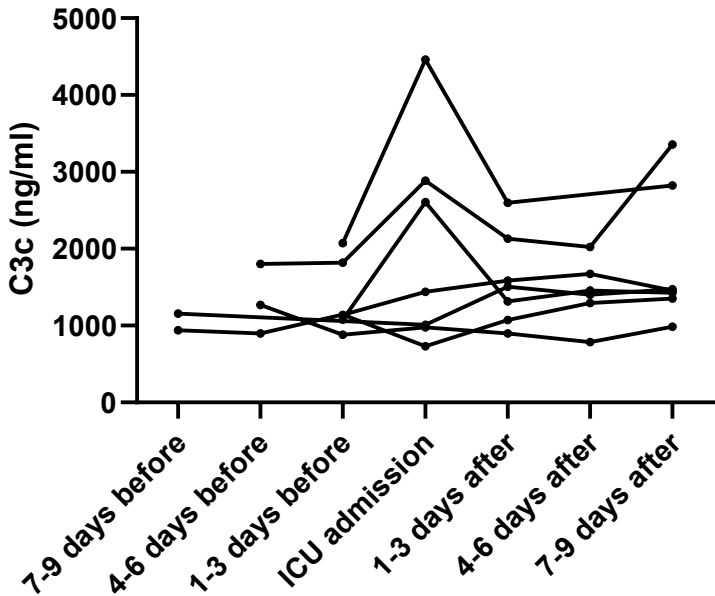

Supplement: jiaa646_supp_supplementary_figure_3b.pdf [file jiaa646_supp_supplementary_figure_3b.pdf]

C.

# TCC

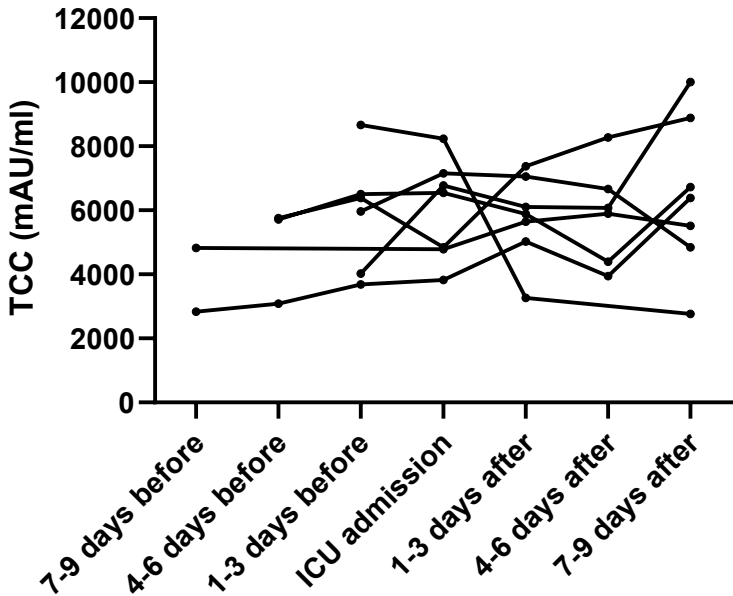

Supplement: jiaa646_supp_supplementary_figure_3c.pdf [file jiaa646_supp_supplementary_figure_3c.pdf]

D.

**C3a**

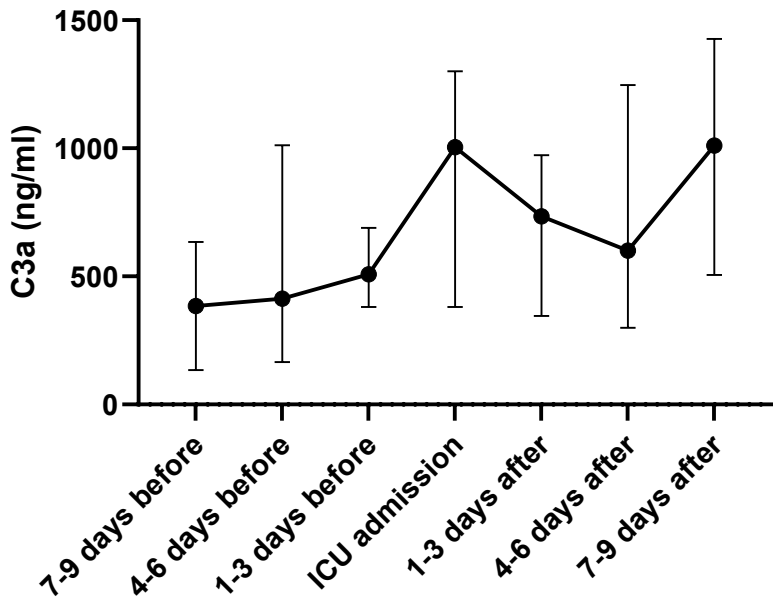

Supplement: jiaa646_supp_supplementary_figure_3d.pdf [file jiaa646_supp_supplementary_figure_3d.pdf]

E.

**C3c**

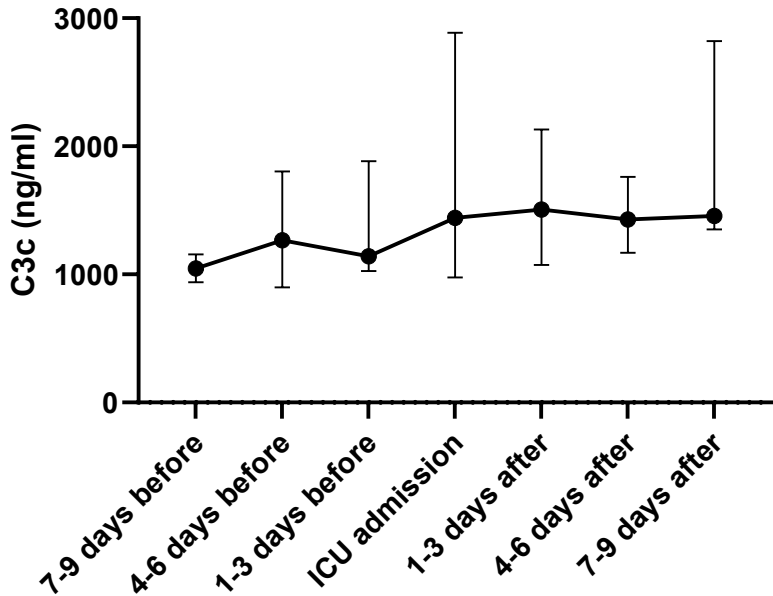

Supplement: jiaa646_supp_supplementary_figure_3e.pdf [file jiaa646_supp_supplementary_figure_3e.pdf]

F.

# TCC

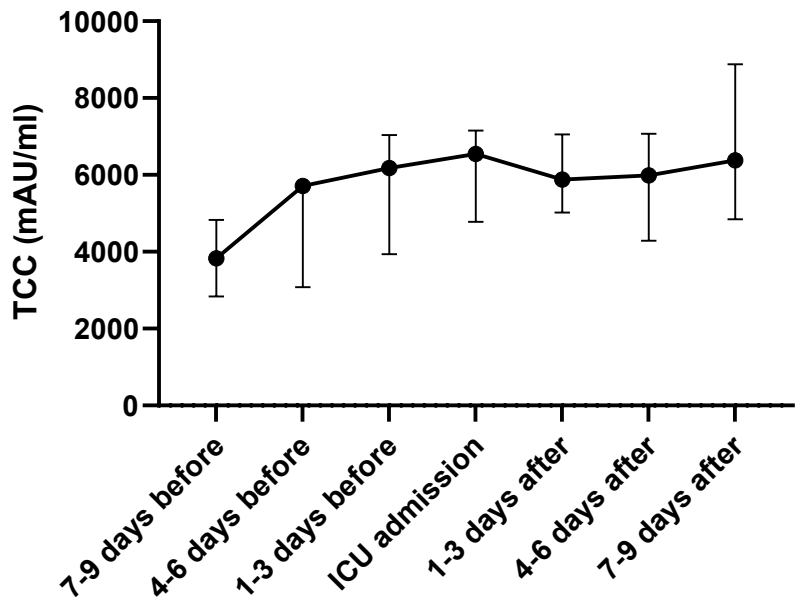

Supplement: jiaa646_supp_supplementary_figure_3f.pdf [file jiaa646_supp_supplementary_figure_3f.pdf]

A.

C3a

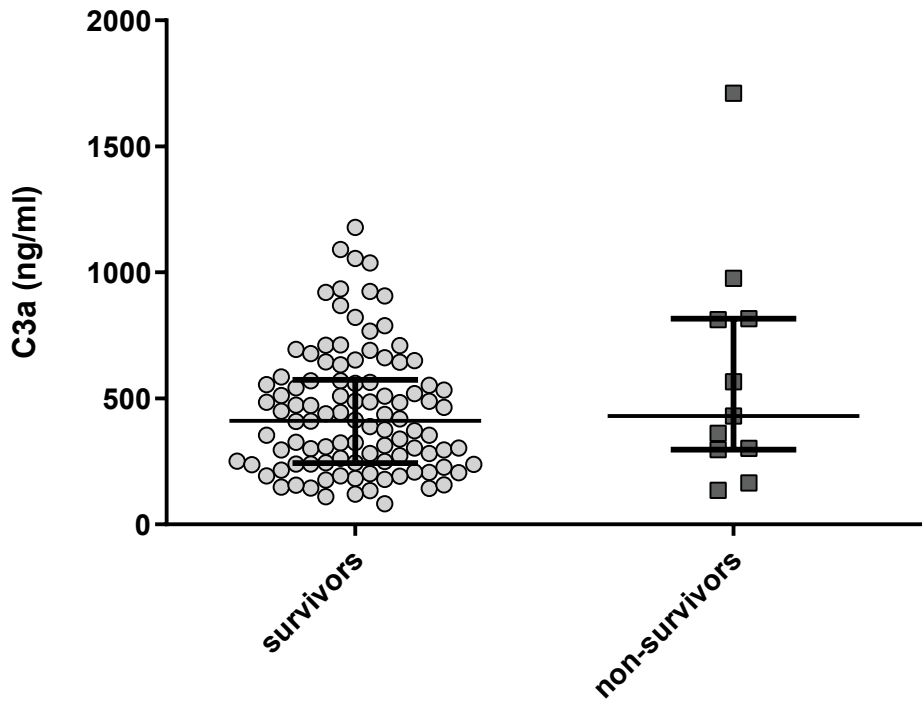

Supplement: jiaa646_supp_supplementary_figure_4a.pdf [file jiaa646_supp_supplementary_figure_4a.pdf]

B.

C3c

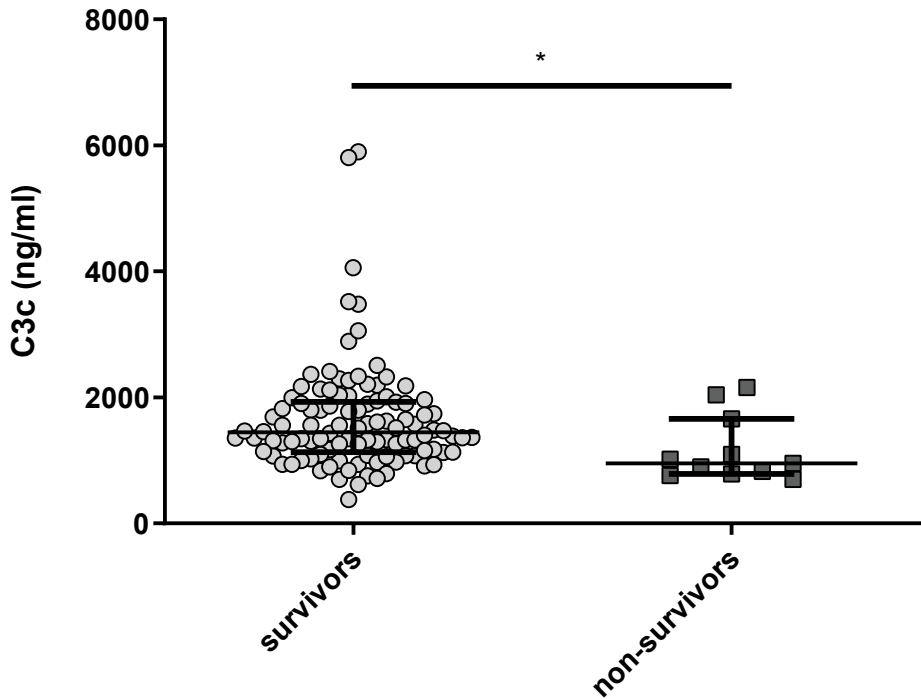

Supplement: jiaa646_supp_supplementary_figure_4b.pdf [file jiaa646_supp_supplementary_figure_4b.pdf]

C.

TCC

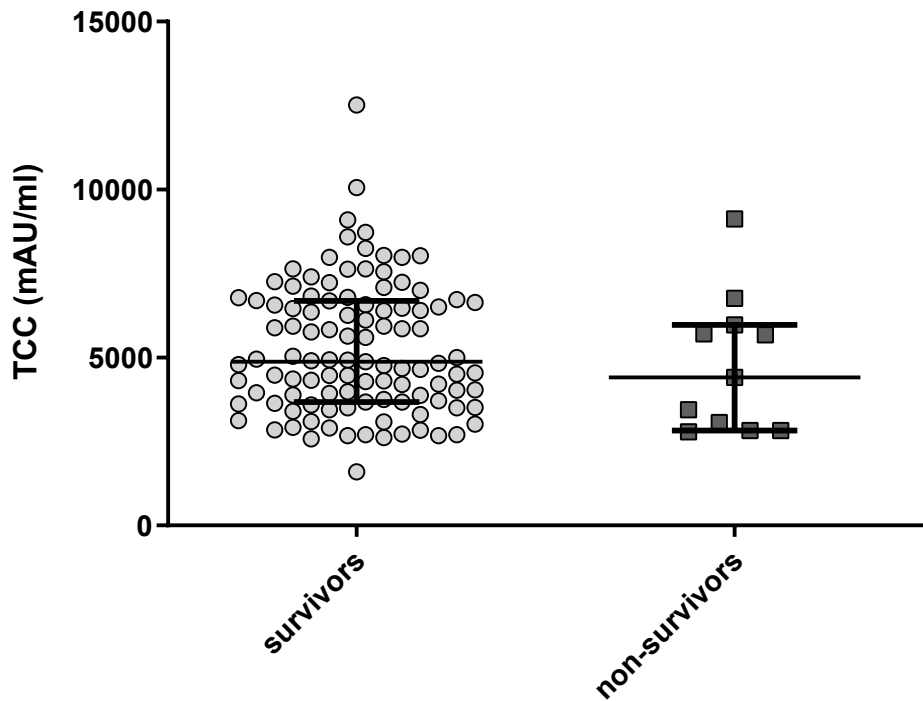

Supplement: jiaa646_supp_supplementary_figure_4c.pdf [file jiaa646_supp_supplementary_figure_4c.pdf]

A.

C3a

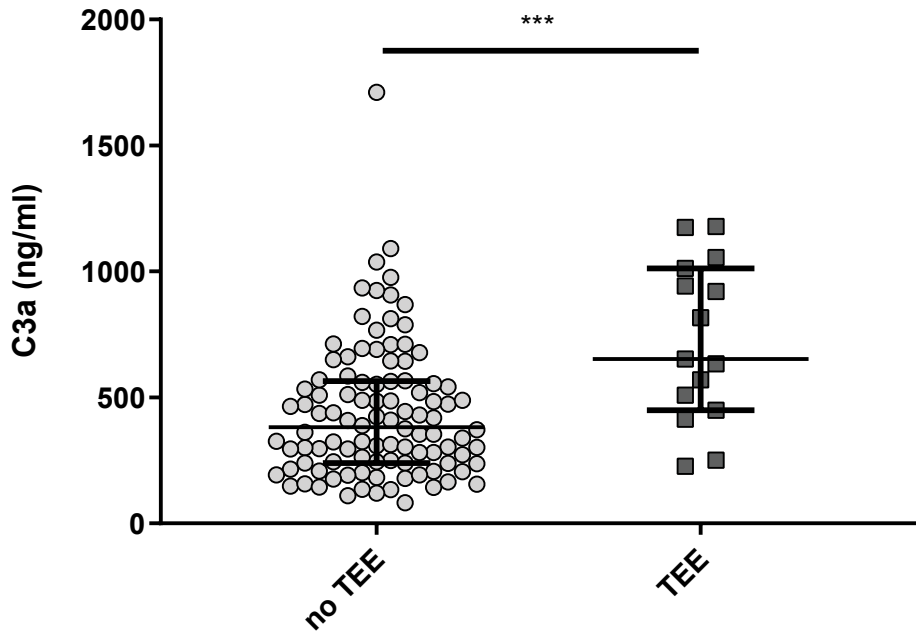

Supplement: jiaa646_supp_supplementary_figure_5a.pdf [file jiaa646_supp_supplementary_figure_5a.pdf]

B.

C3c

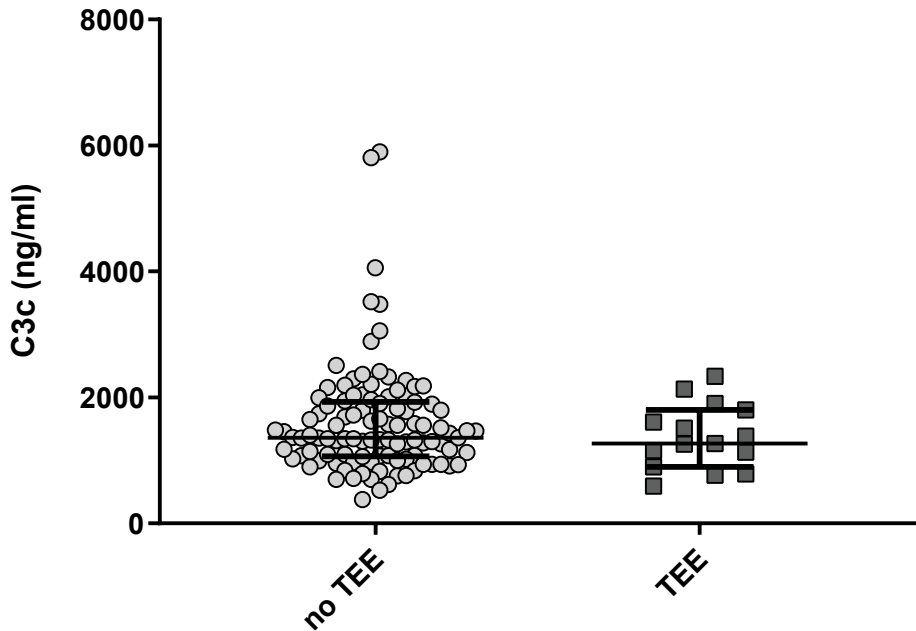

Supplement: jiaa646_supp_supplementary_figure_5b.pdf [file jiaa646_supp_supplementary_figure_5b.pdf]

C.

TCC

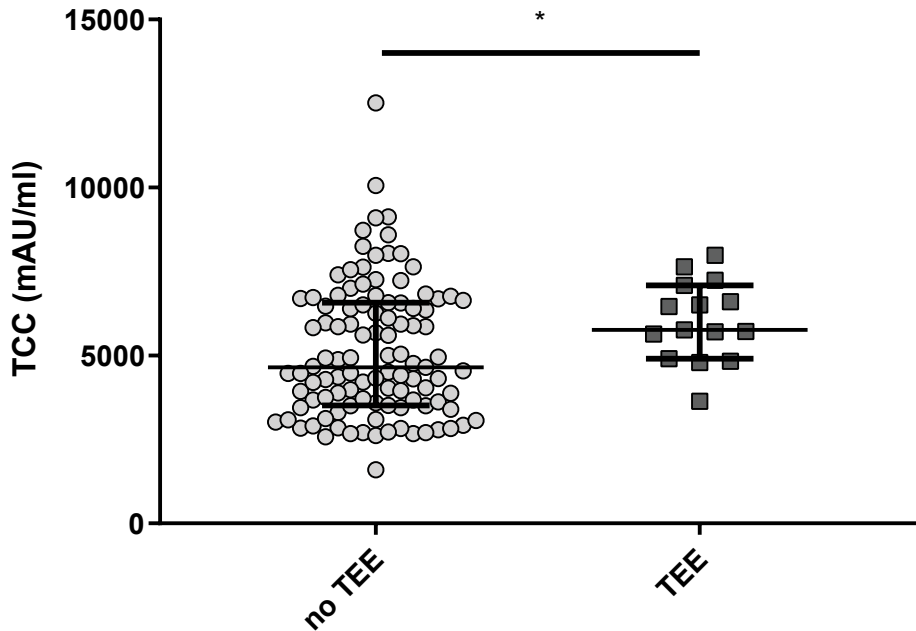

Supplement: jiaa646_supp_supplementary_figure_5c.pdf [file jiaa646_supp_supplementary_figure_5c.pdf]

A.

CRP

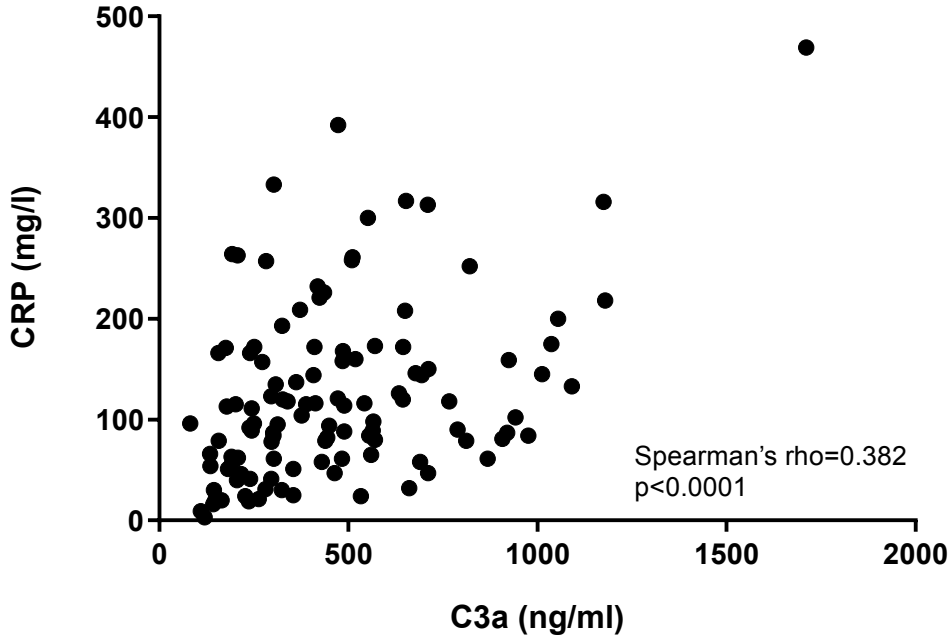

Supplement: jiaa646_supp_supplementary_figure_6a.pdf [file jiaa646_supp_supplementary_figure_6a.pdf]

B.

# Ferritin

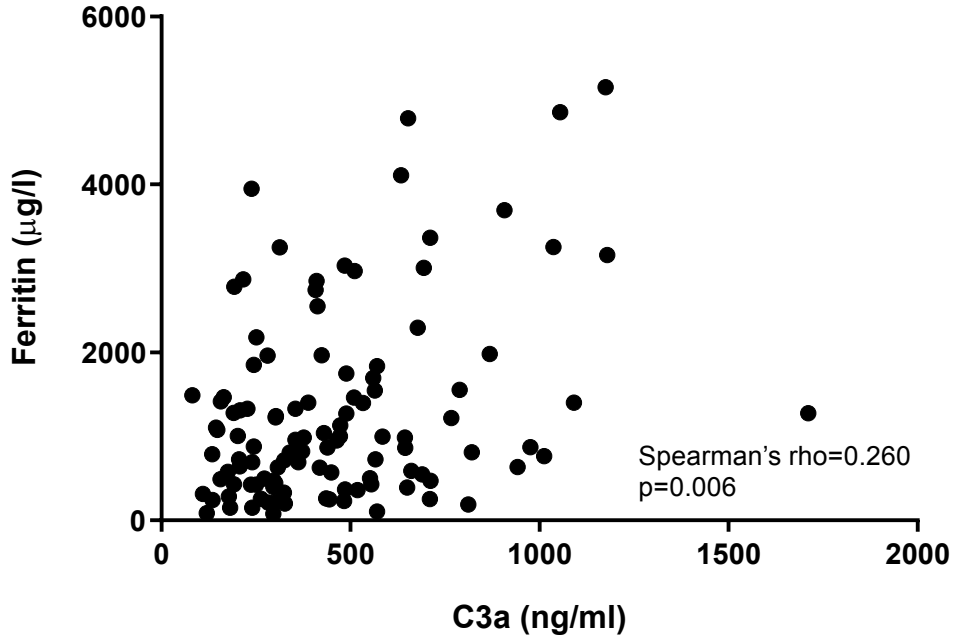

Supplement: jiaa646_supp_supplementary_figure_6b.pdf [file jiaa646_supp_supplementary_figure_6b.pdf]

C.

# D-dimer

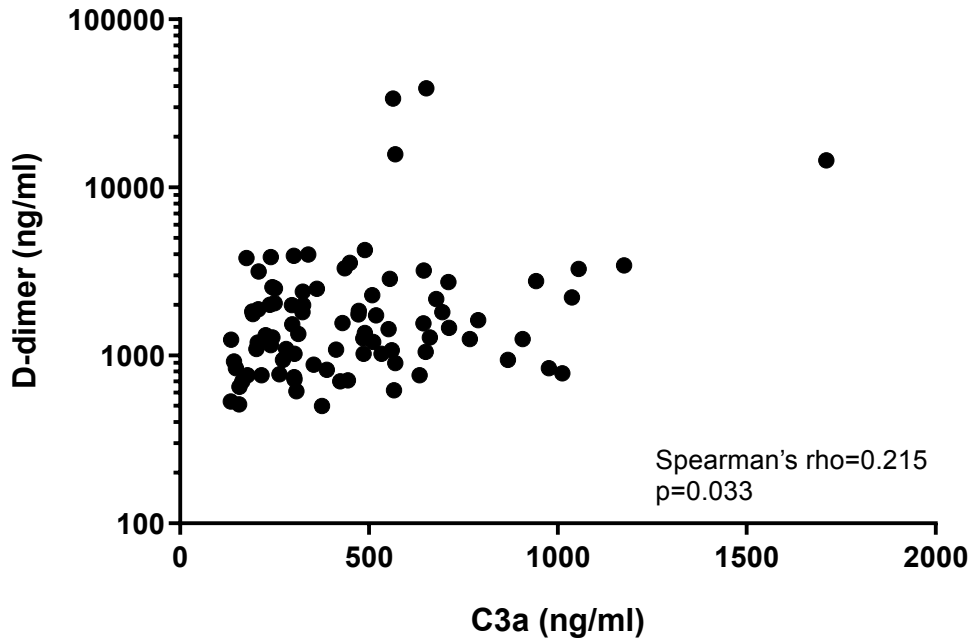

Supplement: jiaa646_supp_supplementary_figure_6c.pdf [file jiaa646_supp_supplementary_figure_6c.pdf]

D.

IL-6

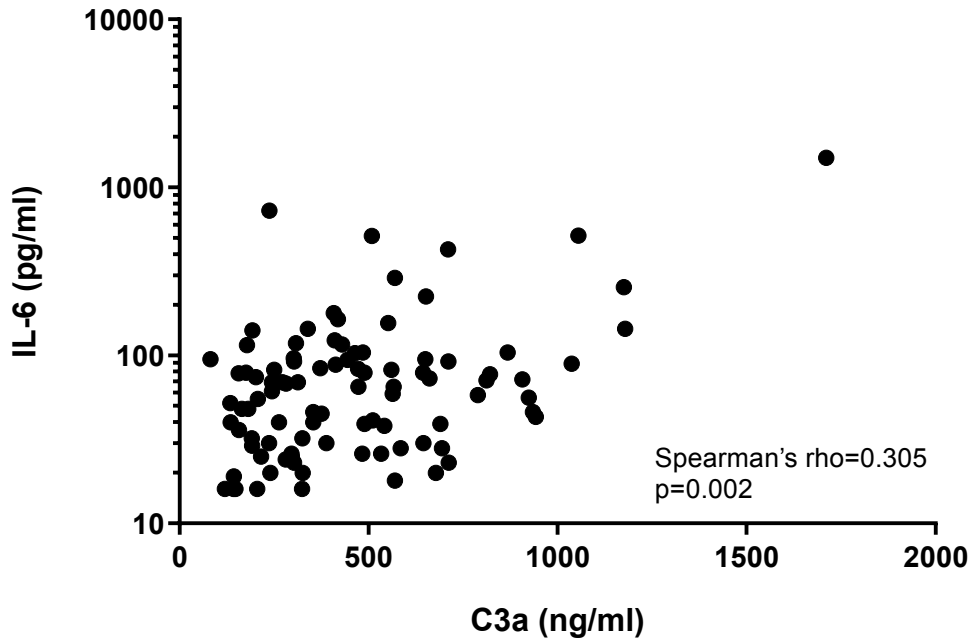

Supplement: jiaa646_supp_supplementary_figure_6d.pdf [file jiaa646_supp_supplementary_figure_6d.pdf]

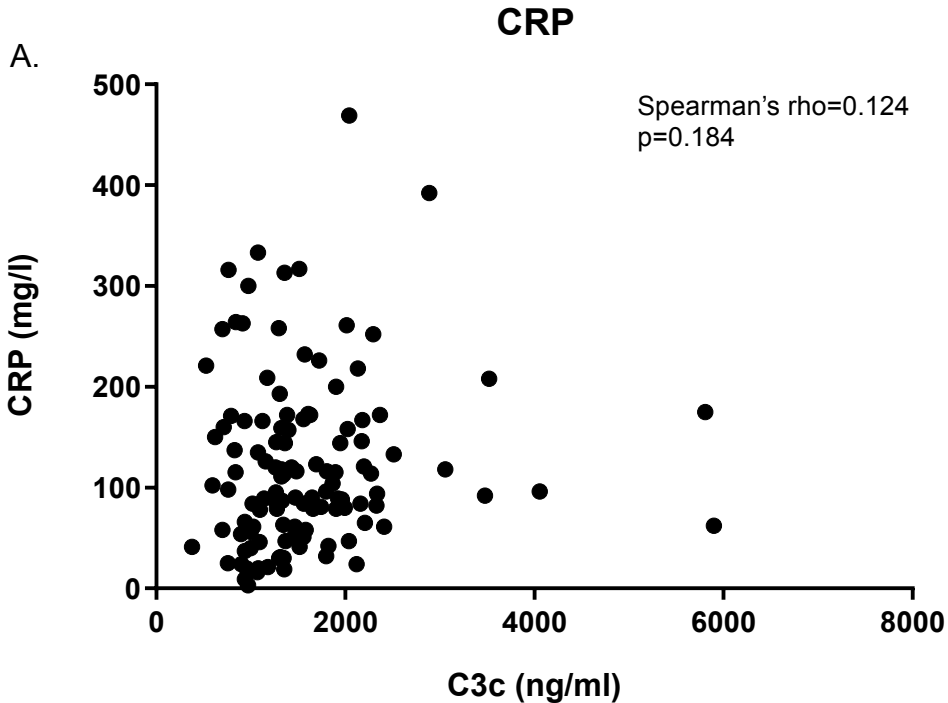

Supplement: jiaa646_supp_supplementary_figure_7a.pdf [file jiaa646_supp_supplementary_figure_7a.pdf]

B.

# Ferritin

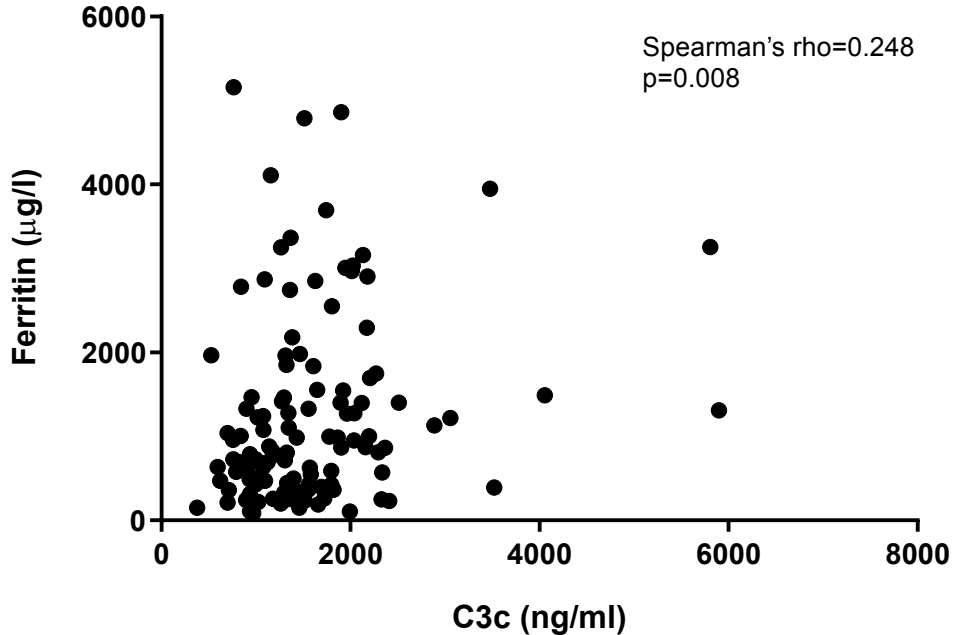

Supplement: jiaa646_supp_supplementary_figure_7b.pdf [file jiaa646_supp_supplementary_figure_7b.pdf]

C. **D-dimer**

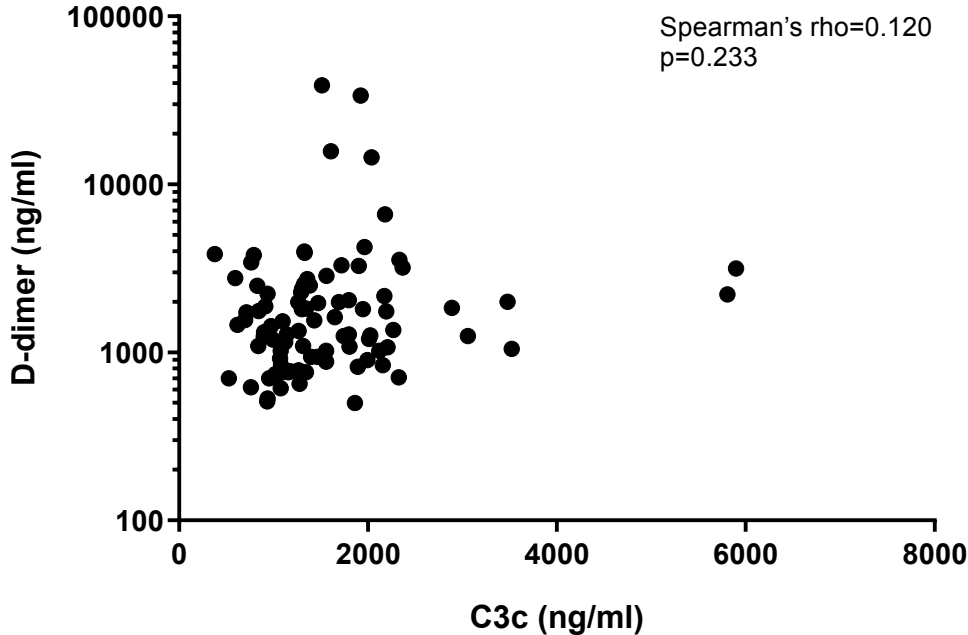

Supplement: jiaa646_supp_supplementary_figure_7c.pdf [file jiaa646_supp_supplementary_figure_7c.pdf]

D.

IL-6

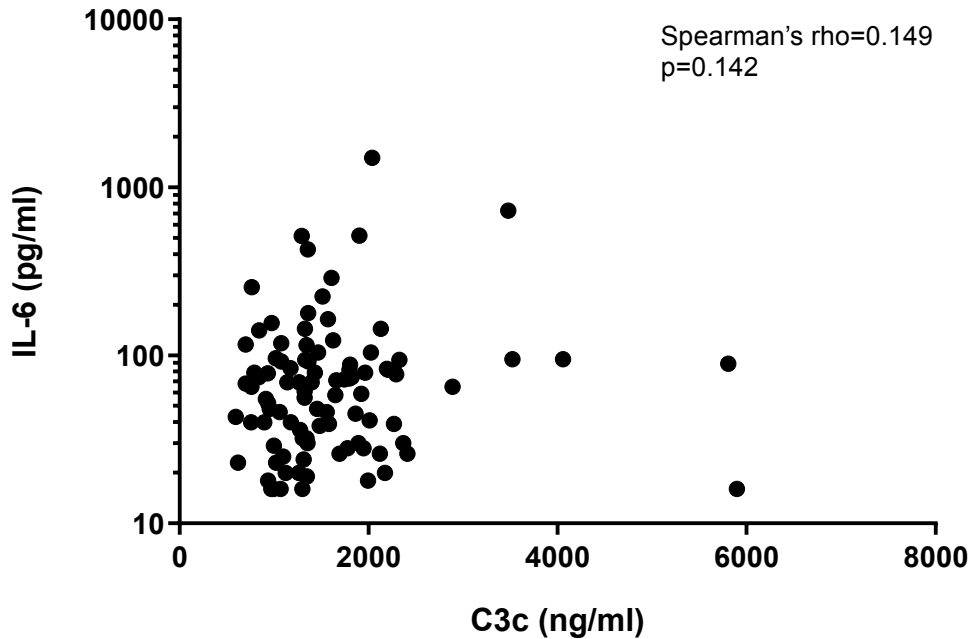

Supplement: jiaa646_supp_supplementary_figure_7d.pdf [file jiaa646_supp_supplementary_figure_7d.pdf]

A.

CRP

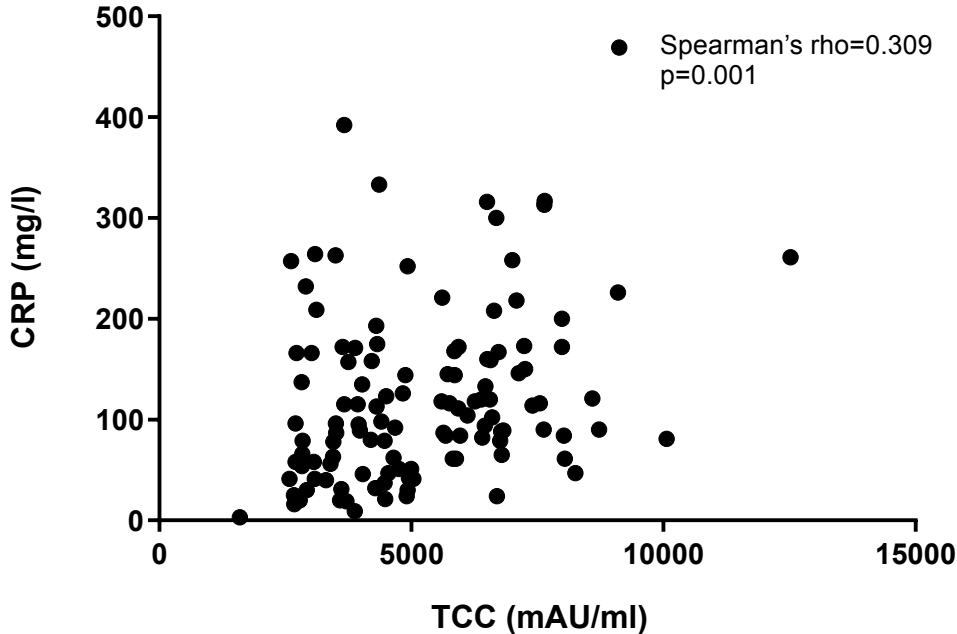

Supplement: jiaa646_supp_supplementary_figure_8a.pdf [file jiaa646_supp_supplementary_figure_8a.pdf]

B.

# Ferritin

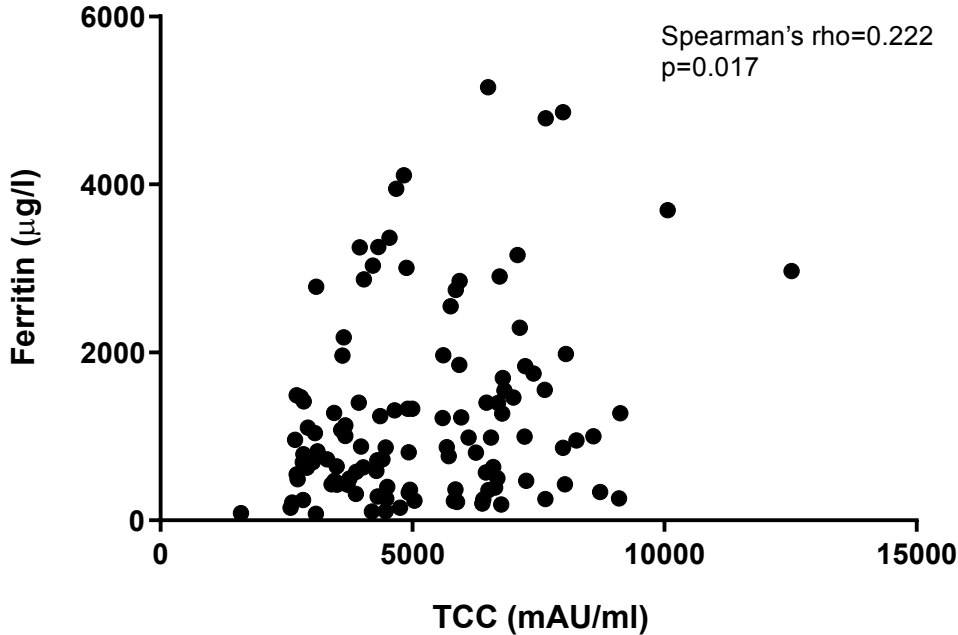

Supplement: jiaa646_supp_supplementary_figure_8b.pdf [file jiaa646_supp_supplementary_figure_8b.pdf]

C.

# D-dimer

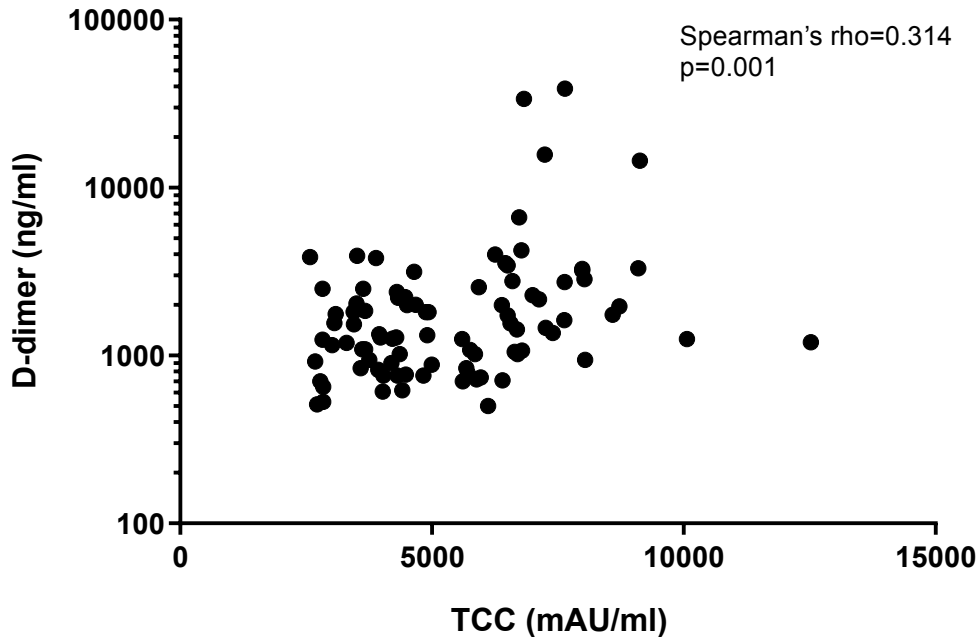

Supplement: jiaa646_supp_supplementary_figure_8c.pdf [file jiaa646_supp_supplementary_figure_8c.pdf]

D.

IL-6

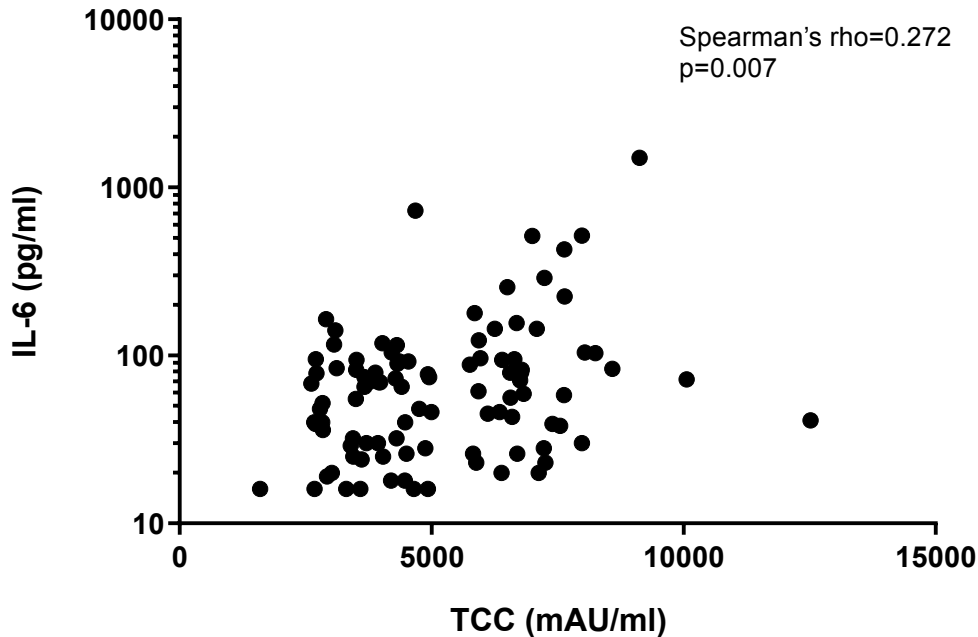

Supplement: jiaa646_supp_supplementary_figure_8d.pdf [file jiaa646_supp_supplementary_figure_8d.pdf]
